# Supplementary material
Source: PubMed Central journal article supplement (PMC4611501)
Supplement: ismej201545x1.pdf [file ismej201545x1.pdf]

## Supplementary Information for

Rapid selective sweep of pre-existing polymorphisms and slow fixation of new mutations in experimental evolution of *Desulfovibrio vulgaris*

Aifen Zhou<sup>1</sup>, Kristina L. Hillesland<sup>2</sup>, Zhili He<sup>1</sup>, Wendy Schackwitz<sup>3</sup>, Qichao Tu<sup>1</sup>, Grant M. Zane<sup>4</sup>, Qiao Ma<sup>1,5</sup>, Yuanyuan Qu<sup>1,5</sup>, David A. Stahl<sup>6</sup>, Judy D. Wall<sup>4</sup>, Terry C. Hazen<sup>7,8</sup>, Matthew W. Fields<sup>9</sup>, Adam P. Arkin<sup>10</sup>, and Jizhong Zhou<sup>1,11,12\*</sup>

**Figure S1** Overview of the experiment.

**Figure S2** Growth curves of single-colony based strains isolated from 1200-generation populations ES9 or EC3 and the ancestor (An).

**Figure S3** Sanger sequencing confirmation of mutations in colony isolates or populations.

**Figure S4** Overview of site-directed mutant generation in *D. vulgaris*.

**Figure S5** Growth curves of site-directed mutants carrying individual SNPs.

**Figure S6** Growth curves of deletion mutants, complemented mutants and respective wild type controls.

**Table S1** Mutations in single-colony based ancestral *D. vulgaris* and evolved strains ES9-11 and EC3-10.

**Table S2** Polymorphic loci in ancestral *D. vulgaris* and selected by evolution environment (confirmed by Sanger sequencing).

**Table S3** Primers used for amplification of DNA fragments harboring mutations.

**Table S4** Specificity of mutation within evolved populations.

**Table S5** PCR Primers used for generation of site-directed mutants.

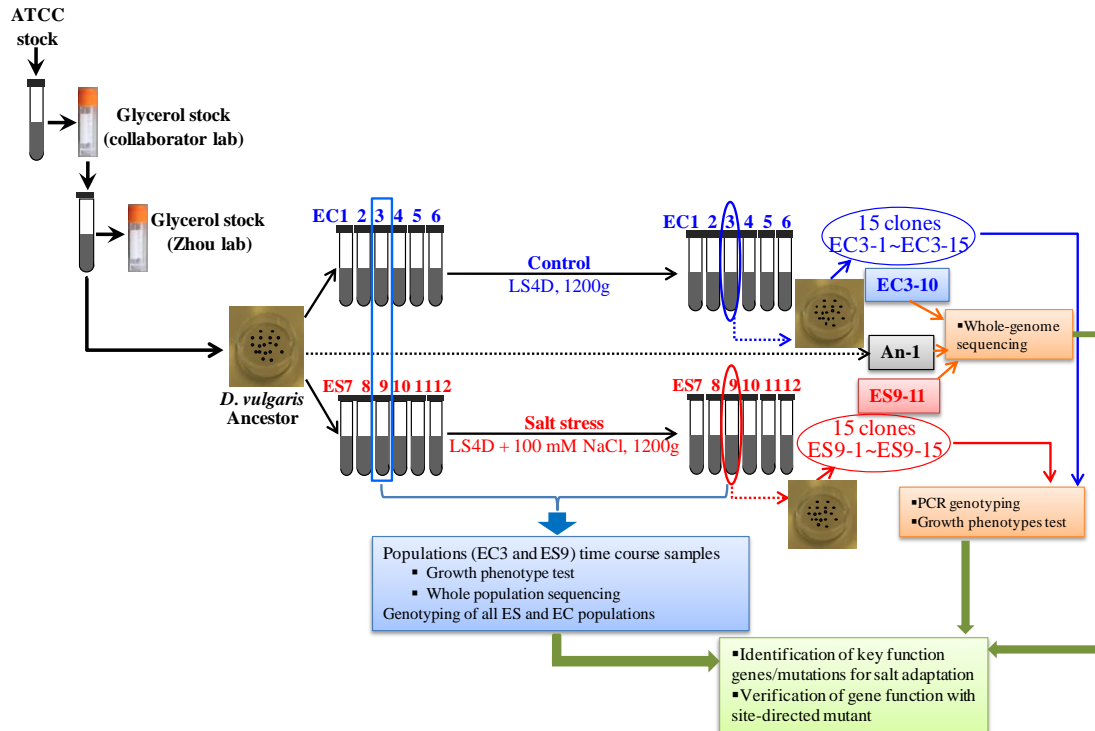

**Figure S1** Overview of the experiment. Experimental evolution was founded with individual clones from pure culture of *D. vulgaris* Hildenborough (DvH). Populations EC1~EC6 were evolved in non-stress environment with defined medium LS4D, Populations ES7~ES12 were evolved in mild salt stress environment with LS4D + 100 mM NaCl, for 1200 generations. Genomic DNA samples of single-colony based strains (EC3-10, ES9-11) isolated from evolved populations EC3 or ES9 were sequenced. The dynamics of salt tolerance phenotypes or mutation frequencies during evolution were investigated with representative populations EC3 and ES9. Population genotyping was conducted to verify whether the mutation selection was common in independently evolved ES or EC populations. The gene function was demonstrated with site-directed mutants.

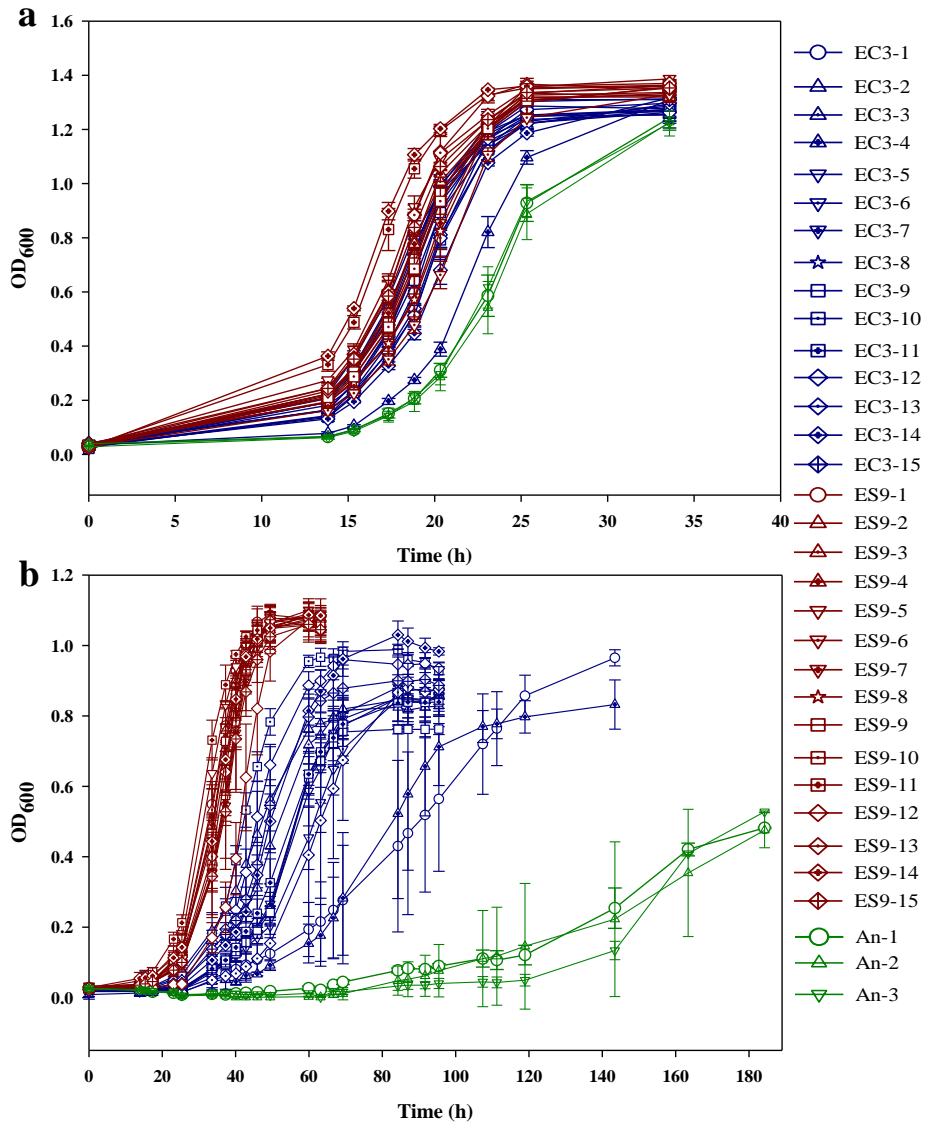

| Growth parameter differences among ES9, EC3, and ancestral strains ( $P < 0.05$ , t-test) |         |                    |       |                     |       |
|-------------------------------------------------------------------------------------------|---------|--------------------|-------|---------------------|-------|
|                                                                                           |         | LS4D               |       | LS4D+250 mM NaCl    |       |
| Growth parameter                                                                          | Strains | Average            | Stdev | Average             | Stdev |
| growth rate ( $\text{hr}^{-1}$ )                                                          | ES9     | 0.24 <sup>b</sup>  | 0.01  | 0.12 <sup>a</sup>   | 0.01  |
|                                                                                           | EC3     | 0.25 <sup>a</sup>  | 0.01  | 0.06 <sup>b</sup>   | 0.01  |
|                                                                                           | An      | 0.23 <sup>b</sup>  | 0.00  | 0.03 <sup>c</sup>   | 0.01  |
| Biomass (OD <sub>600</sub> )                                                              | ES9     | 1.35 <sup>a</sup>  | 0.02  | 1.08 <sup>a</sup>   | 0.01  |
|                                                                                           | EC3     | 1.29 <sup>b</sup>  | 0.02  | 0.90 <sup>b</sup>   | 0.06  |
|                                                                                           | An      | 1.28 <sup>b</sup>  | 0.01  | 0.50 <sup>c</sup>   | 0.03  |
| Lag phase (hr)                                                                            | ES9     | 9.53 <sup>c</sup>  | 0.88  | 23.98 <sup>c</sup>  | 2.11  |
|                                                                                           | EC3     | 11.16 <sup>b</sup> | 1.34  | 36.96 <sup>b</sup>  | 7.06  |
|                                                                                           | An      | 15.84 <sup>a</sup> | 0.15  | 119.93 <sup>a</sup> | 11.94 |

**Figure S2** Growth phenotypes of single-colony based strains isolated from 1200-generation populations ES9 or EC3 and the ancestor (An) under non-stress (LS4D, a) or salt stress (LS4D + 250 mM NaCl, b) conditions. Error bar: standard deviation.

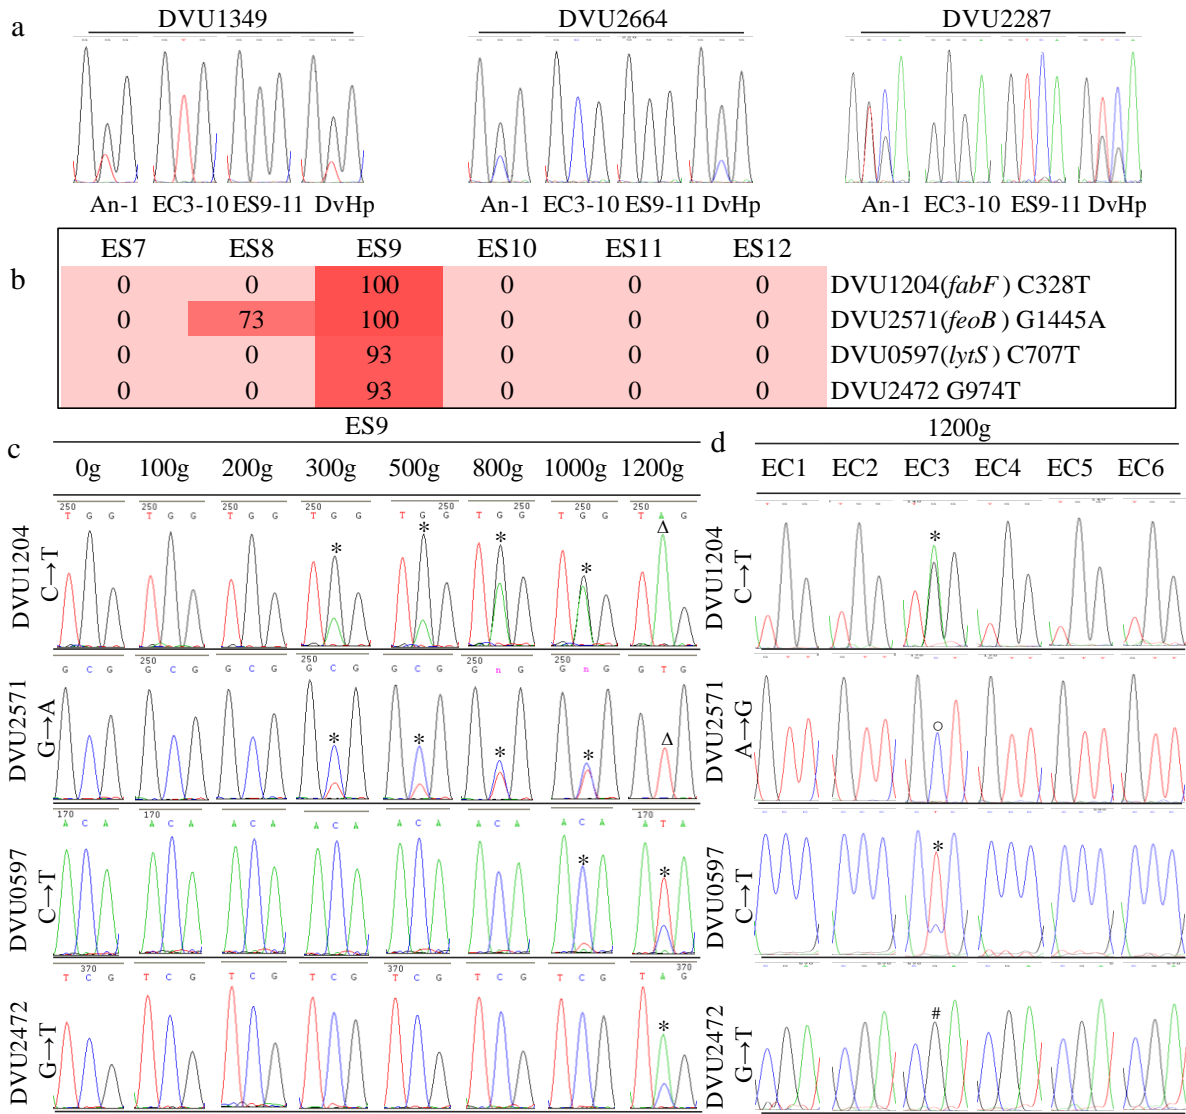

**Figure S3** Sanger sequencing confirmation of mutations in colony isolates or populations. a. mutations in colony isolates (ES9-11 and EC3-10), ancestral colony isolate (An-1), or ancestral population (DvHp). b. PCR genotyping of new mutations in six stress-evolved ES populations (1200g). c. mutation frequencies of four new mutations in ES9 over evolution. d. mutation frequencies in six EC populations (1200g). Chromatograms of the sequences of the nucleotide(s) with mutations and the adjacent nucleotides are shown. \*: polymorphisms;  $\Delta$ : ES-type mutation;  $\circ$ : EC-type mutation; #: no mutation.

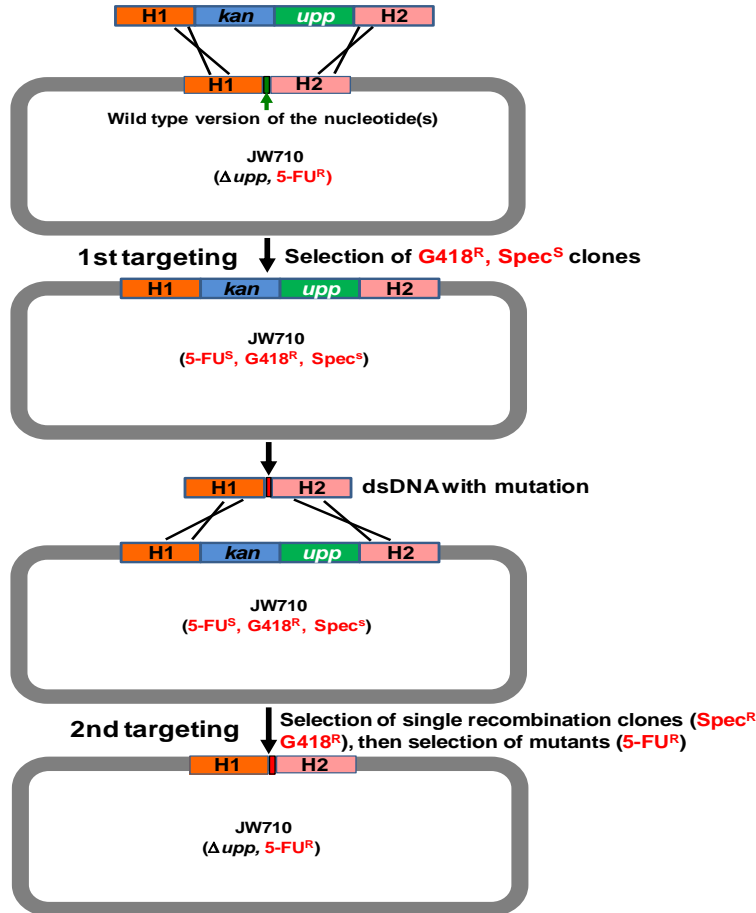

**Figure S4** Overview of site-directed mutant generation in DvH. i). construction of 1st targeting marker replacement suicide vector (only the insert is shown, the vector backbone is not shown). Four DNA fragments (1, the upstream homology region (H1, ~ 700 bp) immediately adjacent to the point mutation; 2, kanamycin selection marker and *upp* gene driven by kanamycin promoter (KAN confers G418 resistance); 3, down-stream homology region (H2, ~ 700 bp) immediately adjacent to the point mutation; 4, backbone region, spectinomycin resistance and pUC origin) were assembled into a marker replacement suicide vector with the SLIC procedure. H1 and H2 were PCR amplified with genomic DNA template. Fragments 2 and 4 were amplified from plasmids pMO746 or pMO719, respectively. After electroporation of the marker replacement suicide vector into strain JW710, the wild-type version of the single nucleotide was replaced by active kanamycin selection marker and *upp* gene with homologous recombination (grey circle: DvH genome). The derived mutant was selected as  $G418^R Spec^S$ . ii). construction of 2nd targeting suicide vector. The suicide vector was assembled with three fragments H1, H2, the backbone region 4 containing spectinomycin resistance and pUC origin with the SLIC procedure. The desired SNP/mutation was included in H1 and H2. After electroporation of the 2nd targeting suicide vector into the  $G418^R Spec^S$  mutant, recombination events resulted in the replacement of kanamycin selection marker and *upp* gene by the SNP/mutation. The resulted site-directed mutant (SDM) was selected by 5-FU resistance and confirmed by Sanger sequencing of the PCR fragments harboring the SNP/mutation with genomic DNA as PCR template.

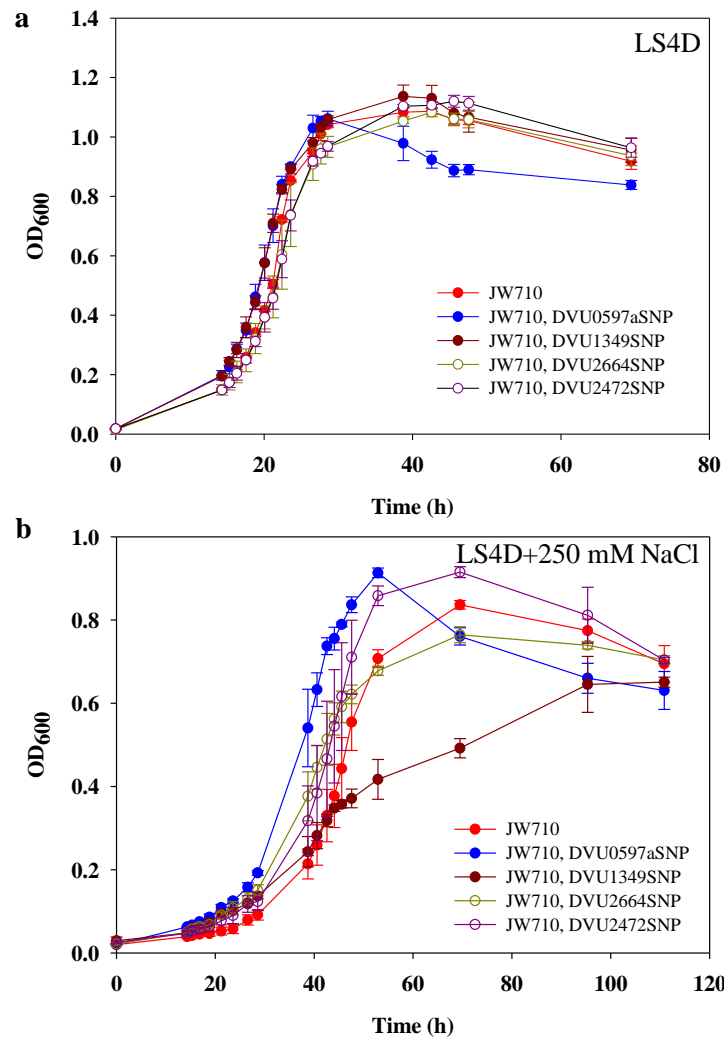

**Figure S5** Growth curves of site-directed mutants carrying individual SNPs under non-stress (LS4D, a) or salt stress (LS4D +250 mM NaCl, b) conditions. Error bars indicate standard deviations.

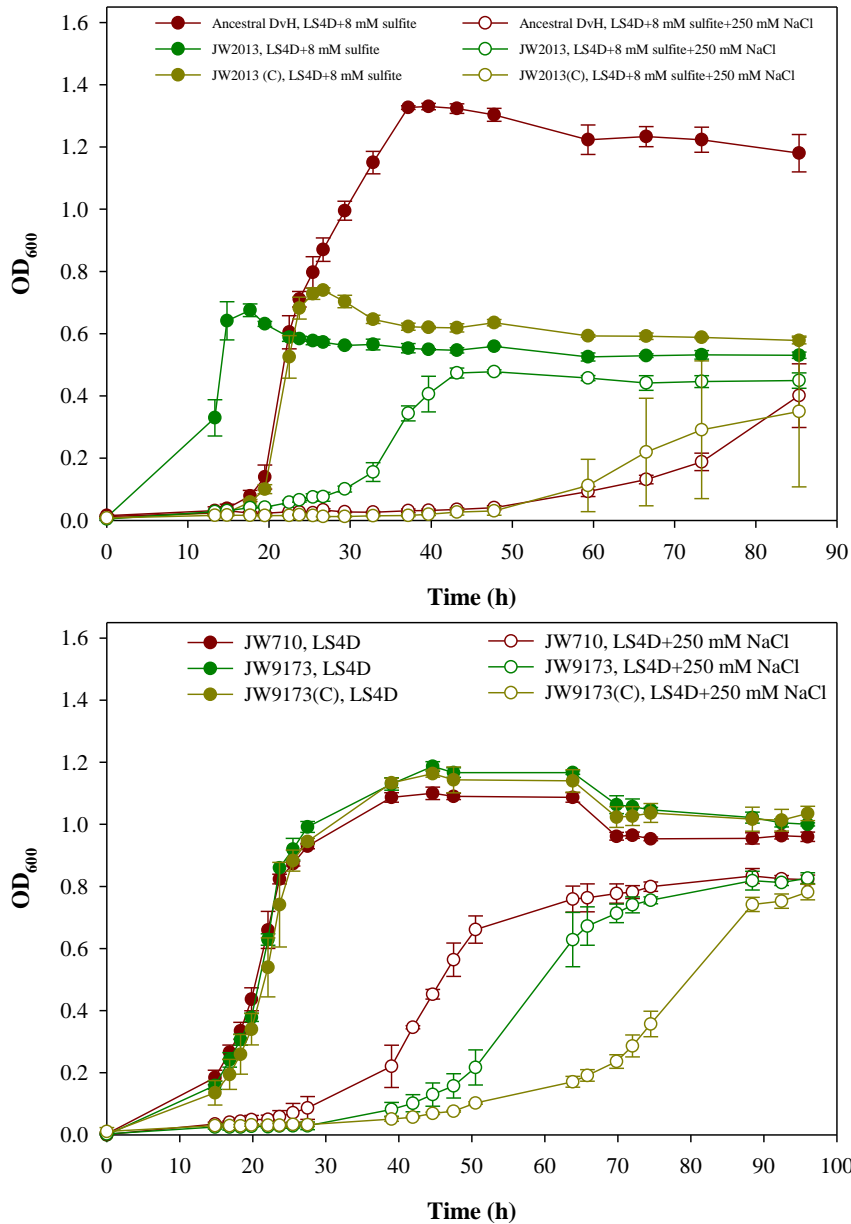

**Figure S6** Growth curves of deletion mutants, complemented mutants and respective wild type controls under non-stress (LS4D) and salt stress (LS4D + 250 mM NaCl) conditions. JW2013: deletion mutant of DVU0597. JW2013(C): JW2013 containing plasmid carrying the wild type version of operon DVU0596-DVU0597 and the upstream and downstream flanking region. JW9173: deletion mutant of DVU2472. JW9173(C): JW2013 containing plasmid carrying the wild type version of DVU2472 driven by the constitutive Kan<sup>R</sup> promoter. JW710: *D. vulgaris* strain with deletion of *upp* which encodes the pyrimidine salvage enzyme uracil phosphoribosyl transferase, this strain was used to generate deletion mutant of DVU2472.

**Table S1 Mutations in single-colony based ancestral *D. vulgaris* and evolved strains ES9-11 and EC3-10**

| Mutation type | Location of mutation | Mutation position | Nucleotide change | Amino acid change    | Affected gene(s)                                                                                                                                                   |
|---------------|----------------------|-------------------|-------------------|----------------------|--------------------------------------------------------------------------------------------------------------------------------------------------------------------|
| SNP           | Gene                 | 1773256           | G → C             | Gln→Glu              | DVU1698, hypothetical protein                                                                                                                                      |
| SNP           | Gene                 | 1913197           | T→G               | Asp→Ala              | DVU1842, lipoprotein, putative                                                                                                                                     |
| SNP           | Gene                 | 3064064           | C→G               | Ala→Gly              | DVU2955, hypothetical protein                                                                                                                                      |
| SNP           | Gene                 | 3064065           | G→C               | Ala→Gly              | DVU2955, hypothetical protein                                                                                                                                      |
| SNP           | Gene                 | 3142198           | A→G               | Asp→Gly              | DVU3023, <i>atoC</i> , sigma-54 dependent DNA-binding response regulator                                                                                           |
| Ins           | Gene                 | 1897096           | 1:T               | 147 more amino acids | DVU1831, transporter, putative, authentic frameshift, pseudogene become real gene                                                                                  |
| Ins           | Gene                 | 2083308           | 1:C               | 243 more amino acids | DVU2001, site-specific recombinase, phage integrase family, authentic frameshift, pseudogene become real gene                                                      |
| Ins           | Gene                 | 3056212           | 1:G               | 400 amino acids      | DVU2950, sensory box protein/GGDEF domain protein, authentic frameshift, pseudogene become real gene                                                               |
| Ins           | Gene                 | 3455727           | 1:T               | 228 amino acids      | DVU3280, peptide ABC transporter, ATP-binding protein, authentic frameshift, pseudogene become real gene                                                           |
| Ins           | Gene                 | 3140596           | 2:GA              | 6 amino acid changes | DVU3022, sensory box histidine kinase/response regulator                                                                                                           |
| Ins           | Gene                 | 3276864           | 1:C               | 22 more amino acids  | DVU3129, hypothetical protein                                                                                                                                      |
| Ins           | Intergenic           | 42868             | 1:G               | No                   | +57 of DVU0036 (hypothetical protein) and -127 of DVU0037 (hypothetical protein)                                                                                   |
| Ins           | Intergenic           | 211389            | 1:A               | No                   | -397 of DVU0169 (oligopeptide/dipeptide ABC transporter, periplasmic oligopeptide/dipeptide-binding protein), -39 of DVU0170 (methyl-accepting chemotaxis protein) |
| Ins           | Intergenic           | 1144620           | 1:C               | No                   | +76 of DVU1042 (twin-arginine translocation protein TatB), -394 of DVU1041 (Sec-independent protein translocase TatC)                                              |
| Ins           | Intergenic           | 1313342           | 1:C               | No                   | +127 of DVU1222 (hypothetical protein), +43 of DVU1223 (hypothetical protein)                                                                                      |
| Ins           | Intergenic           | 2982788           | 2:CC              | No                   | +31 of DVU2884 (peptidase, M18 family), -140 of DVU2885 ( <i>dhaT</i> , alcohol dehydrogenase, iron-containing)                                                    |
| Ins           | Intergenic           | 3066926           | 3:ACG             | No                   | +54 of DVU2959 (hypothetical protein), -33 of DVU2960 (sigma-54 dependent transcriptional regulator)                                                               |
| Ins           | Intergenic           | 3457155           | 3:CGC             | No                   | +165 of DVU3281 (hypothetical protein), +70 of DVU3282 (ADP-ribosylglycohydrolase family protein)                                                                  |
| Del           | Intergenic           | 882517            | -1:C              | No                   | -101 of DVU0796 ( <i>hisD</i> , histidinol dehydrogenase), +29 of DVU0797 (hypothetical protein)                                                                   |
| Del           | Gene                 | 1191169           | -1:C              | 73 more amino acids  | DVU1087, conserved hypothetical protein                                                                                                                            |
| Del           | Gene                 | 1773346           | -1:A              | truncated protein    | DVU1698, hypothetical protein                                                                                                                                      |
| Del           | Gene                 | 3140577           | -2:CA             | 6 amino acid changes | DVU3022, sensory box histidine kinase/response regulator                                                                                                           |



**Table S2 Polymorphic loci in ancestral *D. vulgaris* and selected by evolution environment (confirmed by Sanger sequencing)**

| Location of mutation | Mutation position | Affected gene                                                                         | Sanger sequencing |        |        | Pyro-sequencing |            |            | Amino acid change |            |                   |
|----------------------|-------------------|---------------------------------------------------------------------------------------|-------------------|--------|--------|-----------------|------------|------------|-------------------|------------|-------------------|
|                      |                   |                                                                                       | An                | EC3-10 | ES9-11 | An              | EC3-10     | ES9-11     | An                | EC3-10     | ES9-11            |
| Gene                 | 2775672           | DVU2664, <i>pstB-2</i> , phosphate ABC transporter, ATP-binding protein               | <u>G</u> /c       | C      | G      | Het             | C          | G          | mix               | No         | Ala → Pro         |
| Gene                 | 2381876, 2381877  | DVU2287, <i>Cook</i> , hydrogenase, Cook subunit, selenocysteine-containing, putative | <u>T</u> /c/G     | GG     | TC     | Het             | G(2381876) | C(2381877) | mix               | stop → Gly | stop → Ser        |
| Gene                 | 1426830           | DVU1349, <i>SeGGPS</i> , geranylgeranyl diphosphate synthase                          | G/T               | T      | G      | Het             | T          | G          | mix               | No         | Val → Gly         |
| Gene                 | 2104739           | DVU2023, hypothetical protein                                                         | C/G               | G      | C      | Het             | G          | C          | mix               | No         | Val = Val         |
| Intergenic           | 2502193           | DVU2397, hypothetical protein                                                         | C/G               | G      | C      | Het             | G          | C          | mix               | No         | non-coding (-199) |
| Gene                 | 2905203           | DVU2802, transcriptional regulator, GntR family                                       | G/A               | A      | G      | Het             | A          | G          | mix               | Ala → Thr  | No                |
| Gene                 | 3169435           | DVU3045, <i>fexB</i> , sensory box histidine kinase/response regulator                | G/c               | C      | G      | Het             | C          | G          | mix               | Gly → Arg  | No                |
| Gene                 | 1599469           | DVU1530, metallo-beta-lactamase family protein                                        | C/T               | T      | C      | Het             | T          | C          | mix               | Asp = Asp  | No                |
| Gene                 | 326403            | DVU0281, exopolysaccharide biosynthesis protein, putative                             | G/A               | A      | G      | Het             | A          | G          | mix               | Asp = Asp  | No                |
| Gene                 | 535249            | DVU0467, <i>trpD</i> , anthranilate phosphoribosyltransferase                         | C/G               | C      | G      | Het             | C          | G          | mix               | Leu=Leu    | No                |

Smaller font indicates minor peak in chromatograms of Sanger sequencing. Het: heterozygous. Mix: mixture.  
 Pink: mutations selected in NaCl-evolved ES9-11. Light blue: mutations selected in control-evolved EC3-10.

**Table S3 Primers used for amplification of DNA fragments harboring mutations**

| DVU #                 | Primer sequence                                                 | Product size (bp) |
|-----------------------|-----------------------------------------------------------------|-------------------|
| DVU0597               | Forward: CCCATGATATTGCTCAATGG<br>Reverse: GAATCTGCTCCACCTCTTCG  | 760               |
| DVU2571               | Forward: ACATGCTCGACAGGGTGTTC<br>Reverse: CTCAAGTTCGGTGGTGTCTT  | 584               |
| DVU1204               | Forward: TGGAAATGACATCGAAACCA<br>Reverse: TCGATACGTCCAGCTTGAT   | 501               |
| DVU2472               | Forward: CGAGACCTACGGACACCATT<br>Reverse: CATGCACAACCTGGCGAAG   | 579               |
| DVU2664               | Forward: TTGCAACGTCTCAACGAATG<br>Reverse: TTCGAGTTCAGCCACATCAG  | 594               |
| DVU2287               | Forward: ATGATGCTGGCCTACGAGAT<br>Reverse: GTGGGCAGCTTGAGGTAGAA  | 500               |
| DVU1349               | Forward: GAAGGCTACCTTGCCACTTG<br>Reverse: GAGAGCCCCGGTCTTCAT    | 510               |
| DVU2023               | Forward: GACGACCCGTCGATTTATGA<br>Reverse: TCGCCTCCTCAAGCTTCTTA  | 518               |
| DVU2397               | Forward: ACTCACCGCCATGCTTGT<br>Reverse: GTATTCCATCCGTGCCTCAT    | 552               |
| DVU0942               | Forward: CATCGCCGATTTTCAGGATT<br>Reverse: GCGCAGATGCCATAGAGATA  | 402               |
| DVU2395               | Forward: GATGCTCTCGAAGGATTGTC<br>Reverse: CACCACGTTGAGGTTACACAG | 592               |
| DVU0797               | Forward: AGGTCCGTCGTTTCGTACATC<br>Reverse: CTTCCCTGGCACCGTAAGAG | 543               |
| DVU0799               | Forward: CCTGAAGGTCCGTATGGGTA<br>Reverse: GGGGTCATCATGCTCATCTT  | 558               |
| DVU2802               | Forward: CAGATCATGAAGCTCGTCCA<br>Reverse: GGCGAAGAACGTCTGAAGG   | 522               |
| DVU3045               | Forward: GACTGGCATGAGAGTCATCG<br>Reverse: TCGTACTGCCAGATGGTGTCT | 534               |
| DVU1530               | Forward: ATCGTCTTCGTGGGCTATCA<br>Reverse: ACTGCGAAAGGAAATGCAAC  | 514               |
| DVU0467               | Forward: ATAGCGACCATCCTCGAGAC<br>Reverse: CCAGCAGGTTGAAGAGGGTA  | 532               |
| DVU0281               | Forward: TCGTAAGTCTCGTGGCAGTG<br>Reverse: CCATGACGGGTAGAATCAGG  | 531               |
| DVU0467               | Forward: CGTACAGTTCATCCCGAAT<br>Reverse: AGCAGGTTGAAGAGGGTACG   | 671               |
| DVU2112               | Forward: ATGGGAAAAGGATGGCTTCT<br>Reverse: TATGCCTTCGTCAAGACGTG  | 507               |
| DVU1698               | Forward: CGATGTCATCCGCTACACAA<br>Reverse: GGTATGCGGCGTGTAGTCTC  | 529               |
| DVU1842               | Forward: AGGCTATTCGACCCAGAAG<br>Reverse: TGTAGCGGGTAACCCAGAAG   | 572               |
| DVU2955               | Forward: CGTACCCTGCGCTACAAGTT<br>Reverse: GCACTGGATAGACGGGCTTA  | 507               |
| DVU3023               | Forward: GTTCAGGTCTGCGAAACCAT<br>Reverse: AGAGGGTGCCTTCCACGAG   | 595               |
| DVU2001               | Forward: AAACATCAGGCTTGGACGAC<br>Reverse: GTTCCCAGGTGAAGTTGAG   | 590               |
| DVU2950               | Forward: CTCTTCATCGAACCAGGAGTC<br>Reverse: ATGCGGTACTCTGCCTCGTA | 568               |
| 7.8kb deletion (PCR1) | UP-F: AGGTTCGACATGCTGTTCTCC<br>UP-R: ATTTCTCGACGGACGTATGG       | 550               |
| 7.8kb deletion (PCR2) | DOWN-F: CAGAAAGTCACGGCTCAACA<br>DOWN-R: TCGGTGATGTTACGTCCTTC    | 524               |
| 7.8kb deletion (PCR3) | UP-F:<br>DOWN-R:                                                | 207               |
| DVU1862               | Forward: TCAAGTCGGTCAACGACAAC<br>Reverse: GTCGCAGTCCATGAGCAGTA  | 592               |
| DVU2349               | Forward: GGGGTGCTCCTGTGTAAGA<br>Reverse: CGAATAGATGGGAAGGCAGA   | 556               |

**Table S4. Specificity of mutation within evolved populations**

| Gene                                                     |                              | DVU0597 | DVU2571 | DVU1204 | DVU2472 | DVU0597 | DVU2571 | DVU1204 |
|----------------------------------------------------------|------------------------------|---------|---------|---------|---------|---------|---------|---------|
| Illumina sequencing results<br>(whole genome sequencing) | Mutation position            | 666077  | 2685757 | 1296562 | 2581002 | 666481  | 2685839 | 1296677 |
|                                                          | Nucleotide change            | C→T     | C→T     | G→A     | G→T     | C→T     | T→C     | G→A     |
|                                                          | Identified in strain         | ES9-11  | ES9-11  | ES9-11  | ES9-11  | EC3-10  | EC3-10  | EC3-10  |
| Sanger sequencing results<br>(PCR fragment)              | An-1                         | C       | C       | G       | G       | C       | T       | G       |
|                                                          | An-2                         | C       | C       | G       | G       | C       | T       | G       |
|                                                          | An-4                         | C       | C       | G       | G       | C       | T       | G       |
|                                                          | An-5                         | C       | C       | G       | G       | C       | T       | G       |
|                                                          | An-6                         | C       | C       | G       | G       | C       | T       | G       |
|                                                          | Mutation frequency in An (%) | 0       | 0       | 0       | 0       | 0       | 0       | 0       |
| EC3-1 to EC3-15                                          | EC3-1                        | C       | C       | G       | G       | T       | C       | A       |
|                                                          | EC3-2                        | C       | C       | G       | G       | T       | C       | A       |
|                                                          | EC3-3                        | C       | C       | G       | G       | T       | C       | A       |
|                                                          | EC3-4                        | C       | C       | G       | G       | T/c Het | C       | A       |
|                                                          | EC3-5                        | C       | C       | G       | G       | T       | C       | A       |
|                                                          | EC3-6                        | C       | C       | G       | G       | T       | C       | A       |
|                                                          | EC3-7                        | C       | C       | G       | G       | T       | C       | A       |
|                                                          | EC3-8                        | C       | C       | G       | G       | T       | C       | A       |
|                                                          | EC3-9                        | C       | C       | G       | G       | T       | C       | A       |
|                                                          | EC3-10                       | C       | C       | G       | G       | T       | C       | A       |
|                                                          | EC3-11                       | C       | C       | G       | G       | T       | C       | A       |
|                                                          | EC3-12                       | C       | C       | G       | G       | T       | C       | A       |
|                                                          | EC3-13                       | C       | C       | G       | G       | T       | C       | A       |
|                                                          | EC3-14                       | C       | C       | G       | G       | T       | C       | A       |
|                                                          | EC3-15                       | C       | C       | G       | G       | T       | C       | A       |
| Mutation frequency in EC3 (%)                            | 0                            | 0       | 0       | 0       | 100     | 100     | 100     |         |
| ES9-1 to ES9-15                                          | ES9-1                        | T       | T       | A       | T       | C       | T       | G       |
|                                                          | ES9-2                        | T       | T       | A       | T       | C       | T       | G       |
|                                                          | ES9-3                        | T       | T       | A       | T       | C       | T       | G       |
|                                                          | ES9-4                        | T       | T       | A       | T       | C       | T       | G       |
|                                                          | ES9-5                        | T       | T       | A       | T       | C       | T       | G       |
|                                                          | ES9-6                        | T       | T       | A       | T       | C       | T       | G       |
|                                                          | ES9-7                        | T/c Het | T       | A       | T       | C       | T       | G       |
|                                                          | ES9-8                        | T       | T       | A       | T       | C       | T       | G       |
|                                                          | ES9-9                        | T       | T       | A       | T       | C       | T       | G       |
|                                                          | ES9-10                       | T       | T       | A       | T       | C       | T       | G       |
|                                                          | ES9-11                       | T       | T       | A       | T       | C       | T       | G       |
|                                                          | ES9-12                       | C       | T       | A       | G       | C       | T       | G       |
|                                                          | ES9-13                       | T       | T       | A       | T       | C       | T       | G       |
|                                                          | ES9-14                       | T       | T       | A       | T       | C       | T       | G       |
|                                                          | ES9-15                       | T       | T       | A       | T       | C       | T       | G       |
| Mutation frequency in ES9 (%)                            | 93                           | 100     | 100     | 93      | 0       | 0       | 0       |         |

An-1 to An-6: colony isolates from ancestral population (An); EC3-1 to EC3-15: clones isolated from 1200-generation non-stress-evolved population EC3; ES9-1 to ES9-15: clones isolated from 1200-generation stress-evolved population ES9; Het: polymorphic loci; yellow highlight: no mutation identified.

**Table S5 PCR Primers used for generation of site-directed mutants**

| Primer name | Sequence(5'-3')                                          | Description                                         |
|-------------|----------------------------------------------------------|-----------------------------------------------------|
| 1349-1      | Forward: gccttttctggccttttctcacatAGCGACTTCGGGTTACGTC     | amplification of upstream fragment of DVU1349 SNP   |
| 1349-2      | Reverse: GCGACAAGATATTCGGCACCAAGTAAGCAGGCCGAAGGCGTTTGCCA |                                                     |
| 1349-3      | Forward:GCGCCCCAGCTGGCAATTCCGGGCTCTGCCTCTCGACGGCT        | amplification of downstream fragment of DVU1349 SNP |
| 1349-4      | Reverse: gtCGAGGCATTTCTGTCTGGCTGGCGAAGGAAGTCTGCATCCTC    |                                                     |
| 1349-5      | Forward: CGTCGAGAGGCAGAGCCCAGGCCGAAGGCGTTTGCCA           | amplification of fragment containing DVU1349 SNP    |
| 1349-6      | Reverse: CAAACGCCTTCGGCCTGGGCTCTGCCTCTCGACGGCT           |                                                     |
| 2664-1      | Forward: gccttttctggccttttctcacatGCGAGTATCAGGGGAGGATA    | amplification of upstream fragment of DVU2664 SNP   |
| 2664-2      | Reverse: GCGACAAGATATTCGGCACCAAGTAAGAGACGCGATGTCCAGAGAC  |                                                     |
| 2664-3      | Forward: GCGCCCCAGCTGGCAATTCCGGCACGGGCGATCGAGGAGCGCA     | amplification of downstream fragment of DVU2664 SNP |
| 2664-4      | Reverse: gtCGAGGCATTTCTGTCTGGCTGGCTTCTCTCAAGGCCAACC      |                                                     |
| 2664-5      | Forward:TCCTCGATCGCCCGTGGAGACGCGATGTCCAGAGA              | amplification of fragment containing DVU2664 SNP    |
| 2664-6      | Reverse: TCTGGACATCGCGTCTCCACGGGCGATCGAGGAGCGCAT         |                                                     |
| 0597-1      | Forward: gccttttctggccttttctcacatGCTTCGTGGTTTCATCGTTT    | amplification of upstream fragment of DVU0597 SNP   |
| 0597-2      | Reverse: GCGACAAGATATTCGGCACCAAGTAAGTCTCGTCGAGGATGATCTCG |                                                     |
| 0597-3      | Forward: GCGCCCCAGCTGGCAATTCCGGACGGGTGGCTGCCGTGGCT       | amplification of downstream fragment of DVU0597 SNP |
| 0597-4      | Reverse: gtCGAGGCATTTCTGTCTGGCTGGTCCATGCTCGTGCCAAG       |                                                     |
| 0597-5      | Forward: ACGGCAGCCACCCGTATCTCGTCGAGGATGATCT              | amplification of fragment containing DVU0597 SNP    |
| 0597-6      | Reverse: AGATCATCCTCGACGAGATACGGGTGGCTGCCGT              |                                                     |
| 2472-1      | Forward: gccttttctggccttttctcacatGCGCTGGATGGACAGACAC     | amplification of upstream fragment of DVU2472 SNP   |
| 2472-2      | Reverse: GCGACAAGATATTCGGCACCAAGTAAGGCTCGACGCCGTGGGCGCAA |                                                     |
| 2472-3      | Forward: GCGCCCCAGCTGGCAATTCCGGATGGCGTAGCGACTGCGGCT      | amplification of downstream fragment of DVU2472 SNP |
| 2472-4      | Reverse: gtCGAGGCATTTCTGTCTGGCTGGGCGAAGTGCACCCGTCTCT     |                                                     |
| 2472-5      | Forward: GTCGCTACGCCATAGCTCGACGCCGTGGGCGCA               | amplification of fragment containing DVU2472 SNP    |
| 2472-6      | Reverse: TGCGCCACGGGCTCGAGCTATGGCGTAGCGACTG              |                                                     |
